# Supplementary material for: FOXA1 Directs H3K4 Monomethylation at Enhancers via Recruitment of the Methyltransferase MLL3
Source: PubMed Central journal article supplement (PMC5177601; doi:10.1016/j.celrep.2016.11.028), 2016-12-06

Cell Reports, Volume 17

## Supplemental Information

### **FOXA1 Directs H3K4 Monomethylation at Enhancers via Recruitment of the Methyltransferase MLL3**

**Kamila M. Jozwik, Igor Chernukhin, Aurelien A. Serandour, Sankari Nagarajan, and Jason S. Carroll**

**Supplementary Figure 1A. Validation of MLL3 antibody using RIME. A.** Coverage of MLL3 protein in Mass Spectrometry. All regions of MLL3 protein were represented in Mass spectrometry. **B.** Mass spectrometry spectrum of the MLL3 protein. MLL3 was the top ranked protein following purification using the MLL3 antibody.

**A**

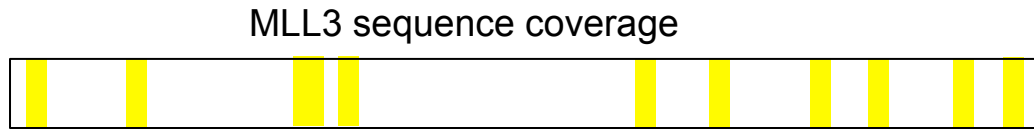

**B**

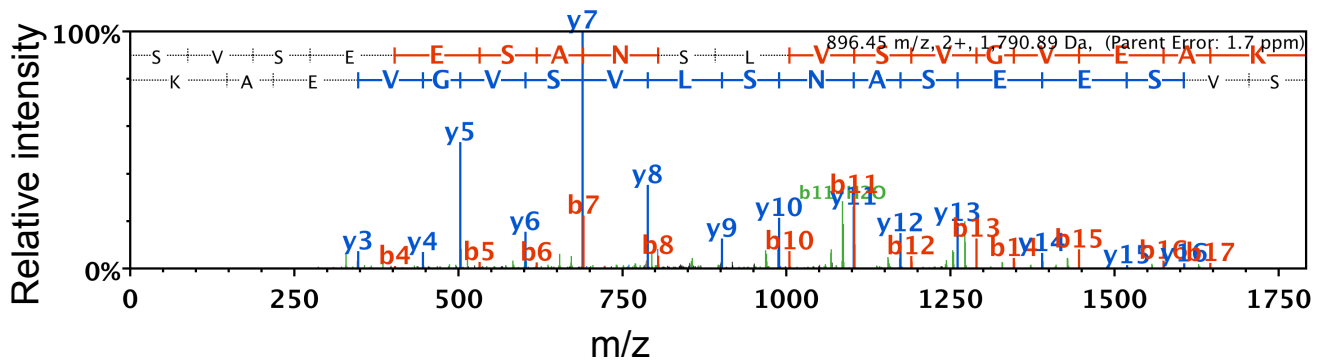

**Supplementary Figure 2. A.** Confirmation of effective FOXA1 silencing. FOXA1 expression upon silencing of FOXA1, confirming knockdown. siCt = siControl. Also included is mRNA changes in MLL3 after silencing of FOXA1. \* denotes  $p < 0.05$ , using T-test. **B.** Overlap between MLL3, FOXA1, H3K4me1 and H3K4me3 binding revealed by ChIP-seq. MLL3 binding sites were co-bound by FOXA1 and the histone marks. The numbers of peaks within each category is shown.

**A**

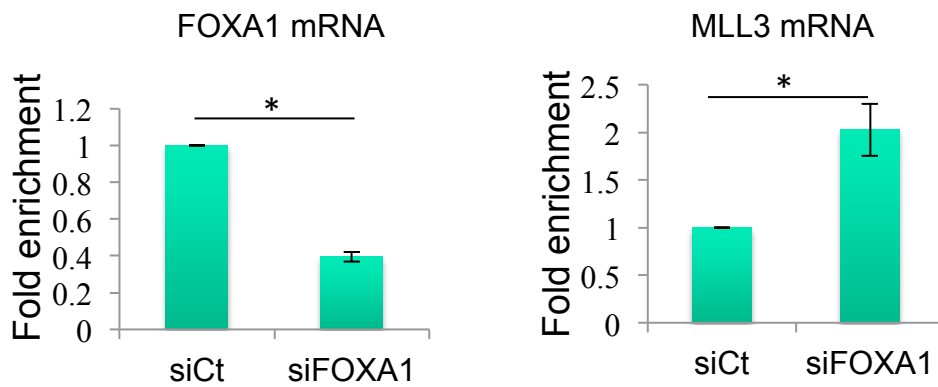

**B**

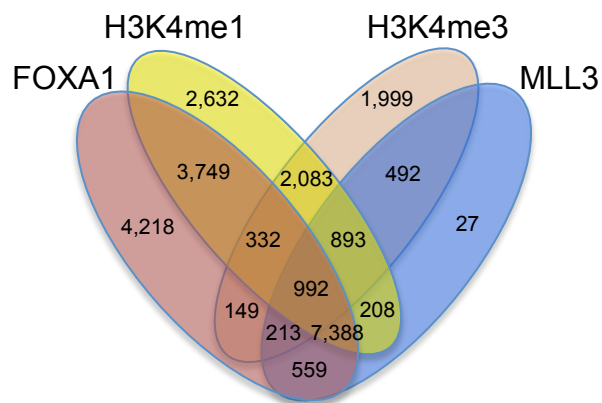

**Supplementary Figure 2C.** ChIP-qPCR validation of MLL3 binding sites that were lost upon FOXA1 silencing. The ChIP data is shown as relative change to siControl. \* denotes  $p < 0.05$ , as determined by t-test.

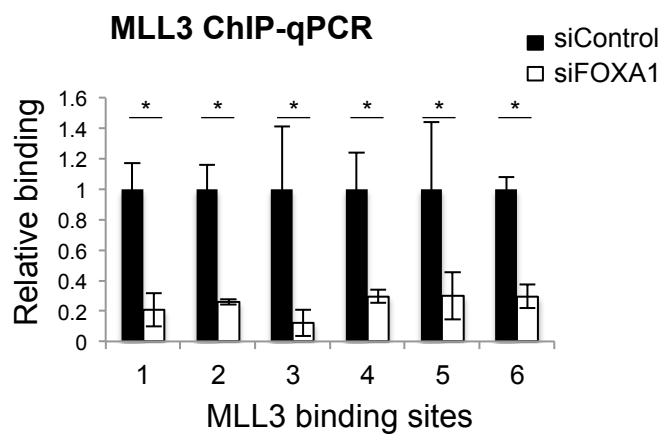

**Supplementary Figure 2D.** Genomic regions around the *TFF1*, *MYC* and *PGR* loci, showing the ER, MLL3, FOXA1, GRHL2 and histone mark signal. Also included is transcription signal (GRO-seq).

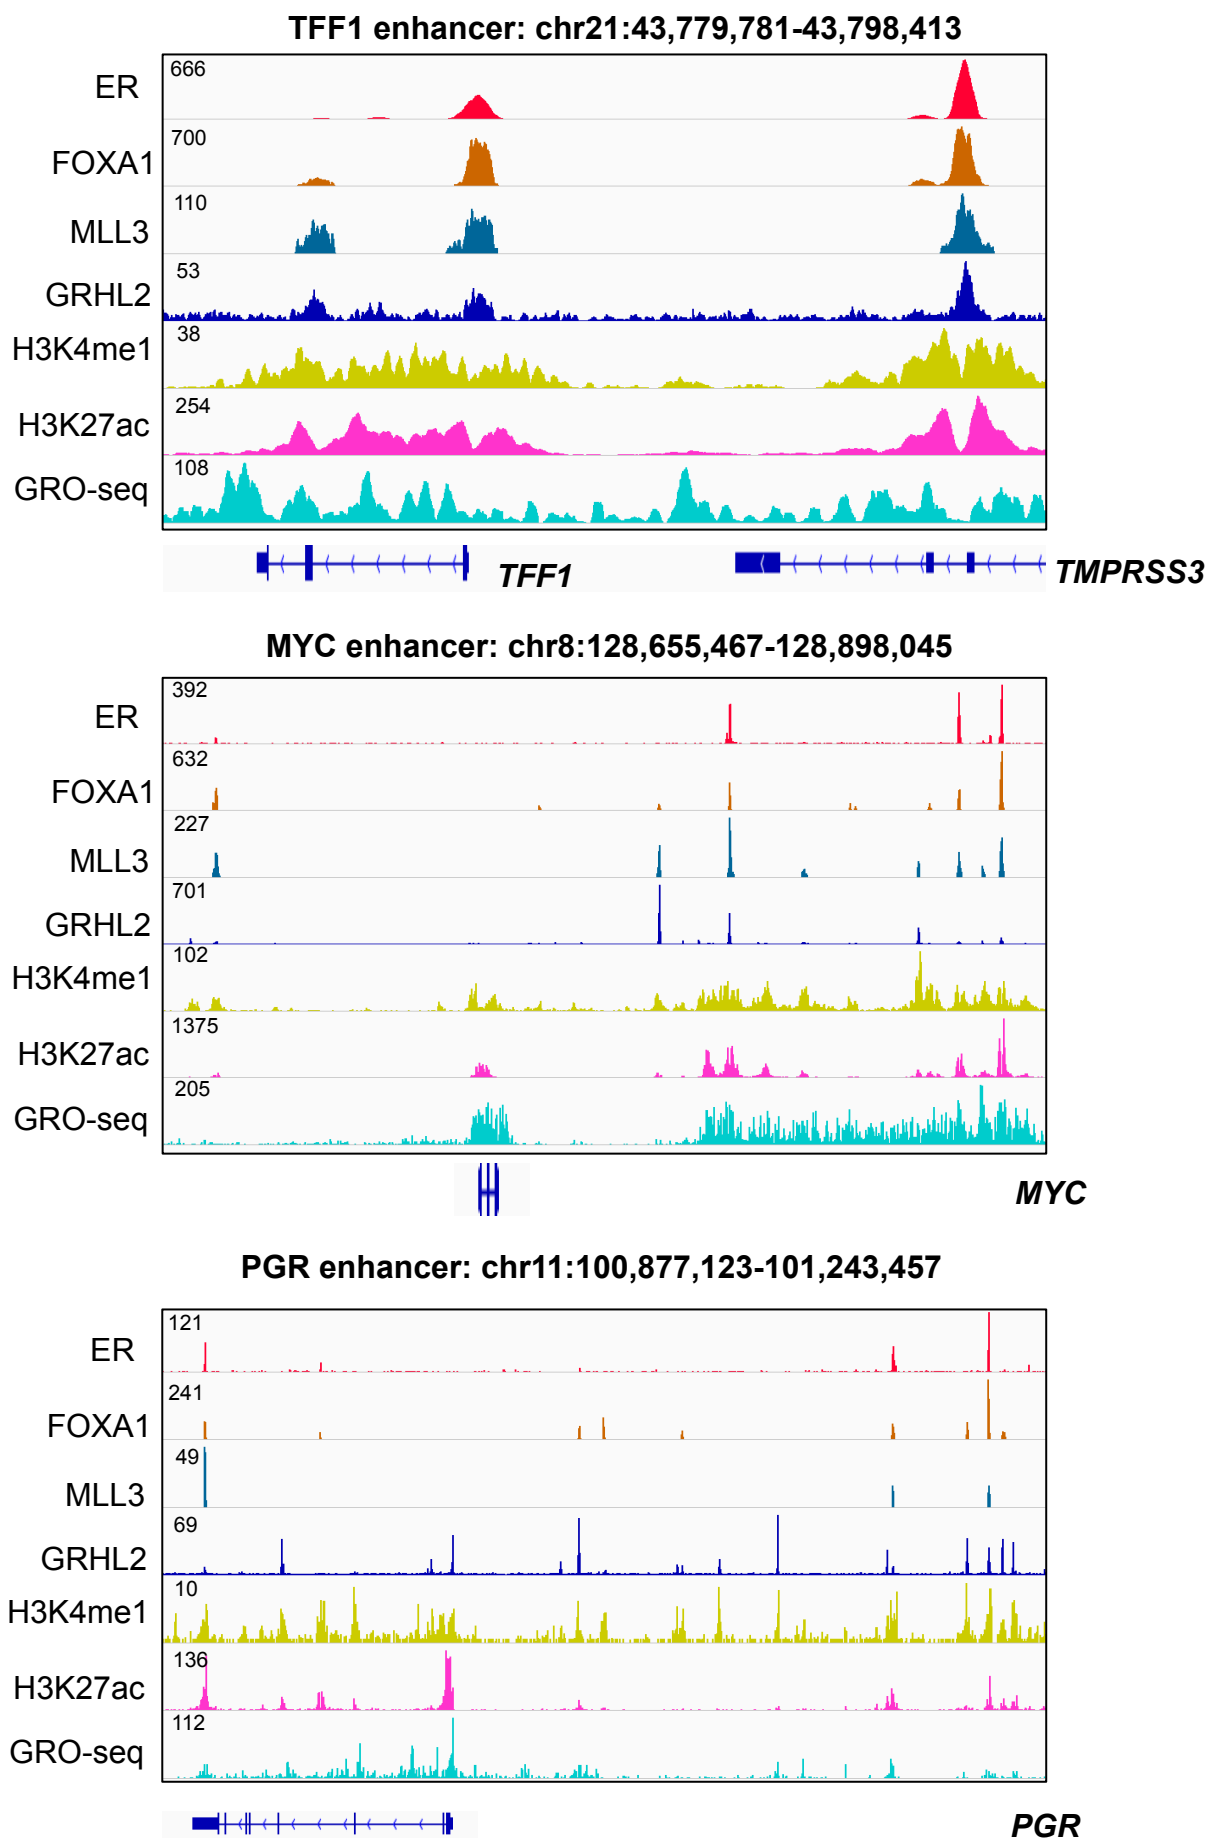

**Supplementary Figure 2E.** FOXA1 is required for H3K27Ac. MCF-7 cells were transfected with siControl or siFOXA1 and H3K27Ac or H3K27me3 ChIP was performed. qPCR was conducted on known FOXA1 binding enhancers.

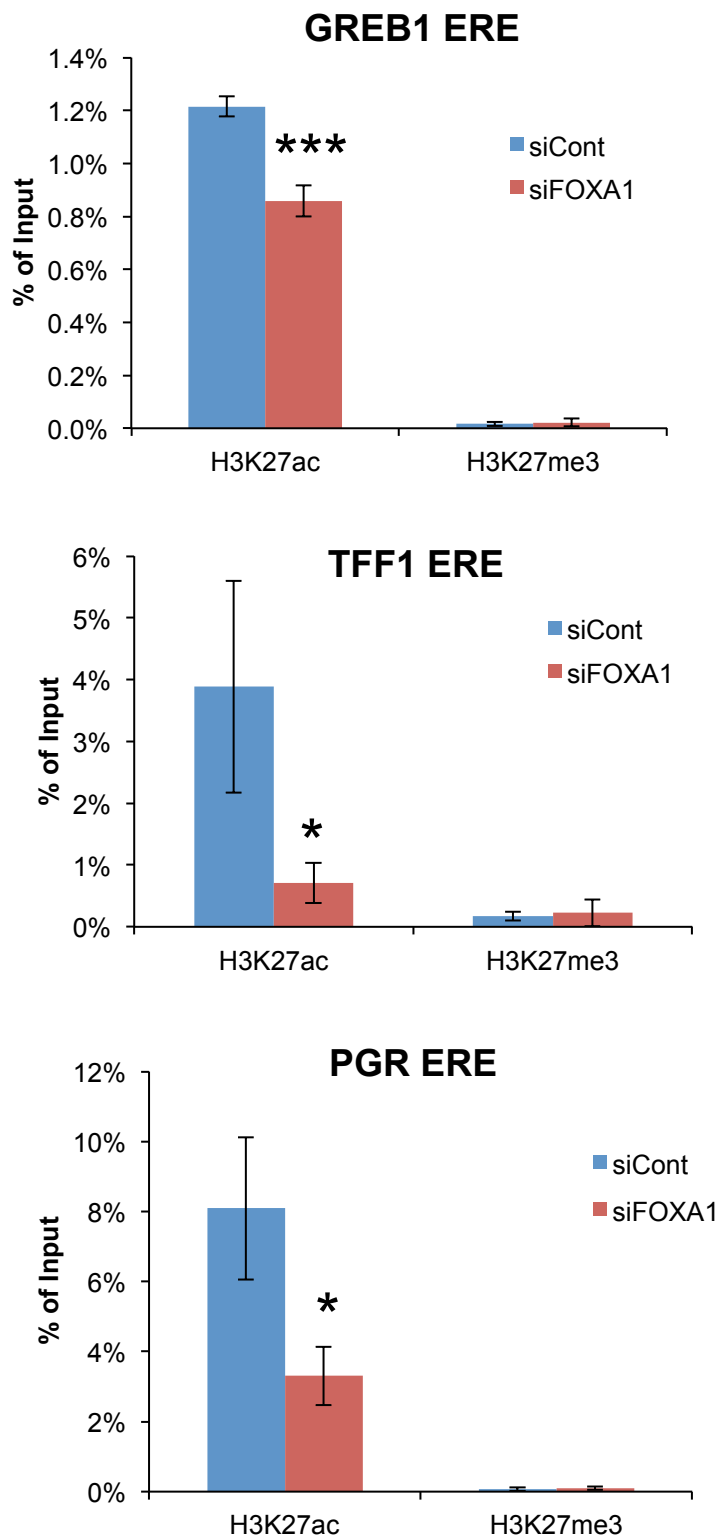

**Supplementary Figure 2.** (F) Effect of FOXA1 knockdown on H3K4me1 occupancy. (G) Effect of MLL3 knockdown on the estrogen-induced expression of GREB1. \* $p \leq 0.05$ , \*\*\* $p \leq 0.001$ . (H) Genomic regions around the *GREB1* loci, showing the ER, MLL3, FOXA1, GRHL2 and histone mark signal. Also included is transcription signal (GRO-seq).

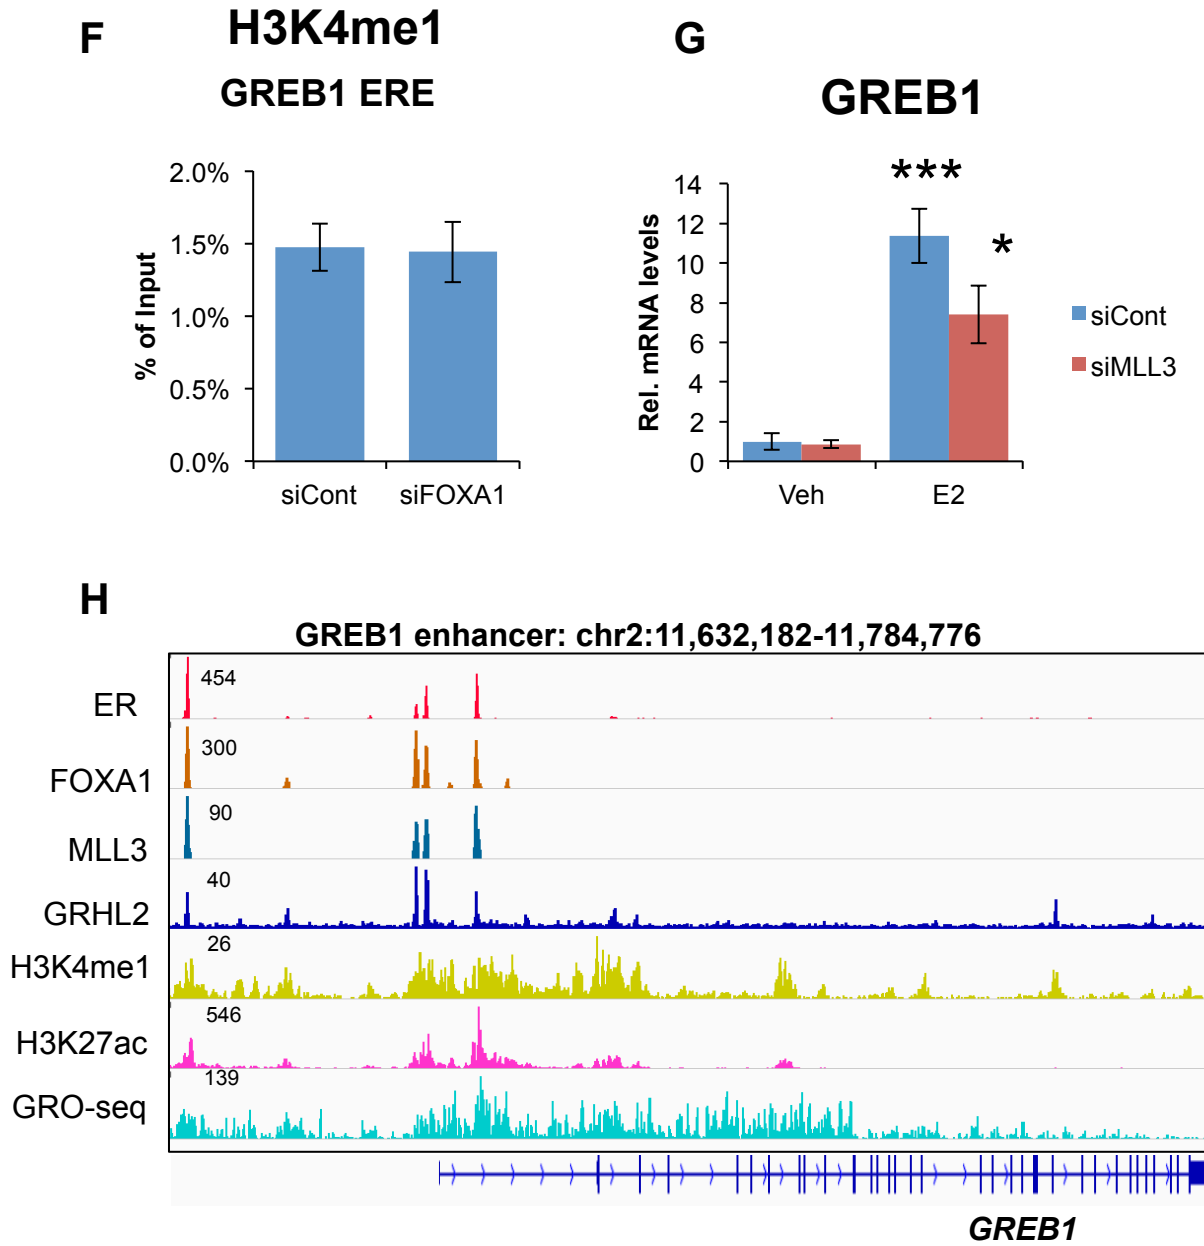

**Supplementary Figure 3.** Venn diagram showing proportion overlap between ChIP-seq peak sets for FOXA1, MLL3, ER and GRHL2. As expected from previous findings, ~50% of ER peaks overlap with FOXA1.

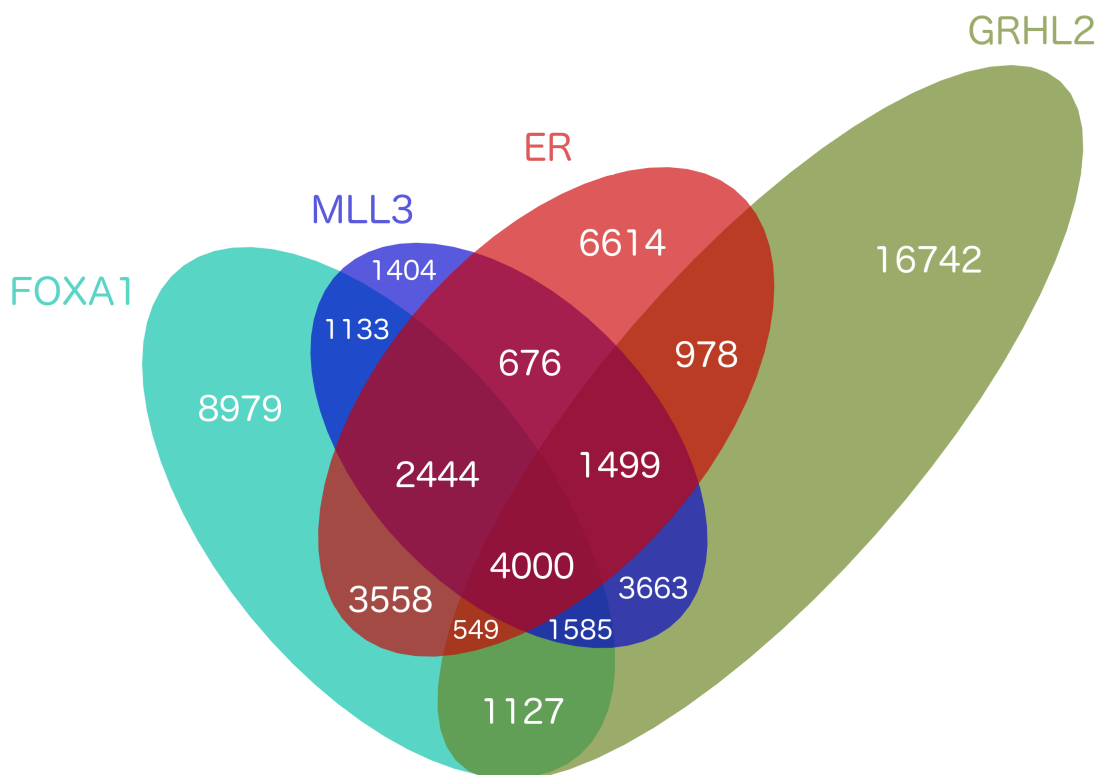

Supplement: mmc1.pdf [file mmc1.pdf]
